# Supplementary material for: Bioactive Properties, Volatile Compounds, and Sensory Profile of Sauerkraut Are Dependent on Cultivar Choice and Storage Conditions
Source: MDPI journal article supplement (doi:10.3390/foods11091218), 2022-04-22
Supplement: s1 [file s1]

Supplementary Table S1. Sensory attributes used to describe sauerkraut samples

| Attributes                        | Definition<br>(Johanningsmeier et al. 2007)                                                                                 | Intensity<br>(Modified from<br>Johanningsmeier et al. 2007) | Hedonic scale<br>(Ritz et al., 1992;<br>Martinez-Villaluenga<br>2012) |
|-----------------------------------|-----------------------------------------------------------------------------------------------------------------------------|-------------------------------------------------------------|-----------------------------------------------------------------------|
| <b>APPEARANCE</b>                 |                                                                                                                             |                                                             |                                                                       |
| White color                       | Graduated scale from green to creamy colour                                                                                 | 1 = green to 10 = creamy                                    | 1 = dislike very much to 7 = like very much                           |
| Red color                         | Graduated scale from light purple to dark purple colour                                                                     | 1 = light purple to 10 = dark purple                        |                                                                       |
| <b>ODOR PROPERTIES</b>            |                                                                                                                             |                                                             |                                                                       |
| Fresh cabbage odor                | Green, vegetative aroma and flavor of raw cabbage                                                                           | 1 = lowest intensity to 10 = highest intensity              | 1 = dislike very much to 7 = like very much                           |
| Sulfur odor                       | The strong sulfur note that is characteristic of properly fermented sauerkraut.                                             | 1 = lowest intensity to 10 = highest intensity              | 1 = dislike very much to 7 = like very much                           |
| Off-odor                          | Open scale with space allotted for a write-in descriptor to be used when an unanticipated (and abnormal) odor is observed   | Detected or not detected                                    | Not applicable                                                        |
| <b>IMPRESSION WHILE CHEWING</b>   |                                                                                                                             |                                                             |                                                                       |
| Hardness                          | The amount of force or effort required for masticating the sample                                                           | 1 = lowest intensity to 10 = highest intensity              | 1 = dislike very much to 7 = like very much                           |
| Crunchiness                       | Sound and feeling associated with chewing raw vegetables                                                                    | 1 = lowest intensity to 10 = highest intensity              | 1 = dislike very much to 7 = like very much                           |
| Juiciness                         | The amount of brine in the kraut product                                                                                    | 1 = lowest intensity to 10 = highest intensity              | 1 = dislike very much to 7 = like very much                           |
| <b>TASTE AND RETRONASAL SMELL</b> |                                                                                                                             |                                                             |                                                                       |
| Fresh cabbage taste               | Green, vegetative aroma and flavor of raw cabbage                                                                           | 1 = lowest intensity to 10 = highest intensity              | 1 = dislike very much to 7 = like very much                           |
| Sulfur taste                      | The strong sulfur note that is characteristic of properly fermented sauerkraut                                              | 1 = lowest intensity to 10 = highest intensity              | 1 = dislike very much to 7 = like very much                           |
| Sweetness                         | Sweet taste. Example: sucrose in water                                                                                      | 1 = lowest intensity to 10 = highest intensity              | 1 = dislike very much to 7 = like very much                           |
| Saltiness                         | Salty taste. Example: sodium chloride in water                                                                              | 1 = lowest intensity to 10 = highest intensity              | 1 = dislike very much to 7 = like very much                           |
| Sourness                          | Sour taste. Example: citric acid in water                                                                                   | 1 = lowest intensity to 10 = highest intensity              | 1 = dislike very much to 7 = like very much                           |
| Bitterness                        | Bitter taste. Example: caffeine in water                                                                                    | 1 = lowest intensity to 10 = highest intensity              | 1 = dislike very much to 7 = like very much                           |
| Astringency                       | Drying, shrinking sensation of oral tissues. Example: alum in water                                                         | 1 = lowest intensity to 10 = highest intensity              | 1 = dislike very much to 7 = like very much                           |
| Off-taste                         | Open scale with space allotted for a write-in descriptor to be used when an unanticipated (and abnormal) flavor is observed | Detected or not detected                                    | Not applicable                                                        |
| <b>OVERALL GRADE</b>              |                                                                                                                             |                                                             |                                                                       |
| Overall grade                     | Overall quality<br>(Martinez-Villaluenga et al. 2012)                                                                       | 1 = lowest intensity to 10 = highest intensity              | 1 = dislike very much to 7 = like very much                           |

Supplementary Table S2. Sensory scores of sauerkraut samples from 'Brgijski', 'Žminjski' and commercial sauerkrauts (CS-1, CS-2, and CS-3) obtained by the QDA method.

| Sensory attributes  | Sauerkraut samples |             |              |             |              | <i>p-value</i> |
|---------------------|--------------------|-------------|--------------|-------------|--------------|----------------|
|                     | 'Brgijski'         | 'Žminjski'  | CS-1         | CS-2        | CS-3         |                |
| Color white         | 0 ± 0 d            | 0 ± 0 d     | 4.6 ± 1.8 c  | 7.9 ± 0.7 a | 6.1 ± 1.7 b  | ***            |
| Color red           | 4.6 ± 1 a          | 4.8 ± 1.1 a | 0 ± 0 b      | 0 ± 0 b     | 0 ± 0 b      | ***            |
| Fresh cabbage odor  | 4 ± 1.7 a          | 3.8 ± 1.7 a | 4.1 ± 1.7 a  | 2.5 ± 0.7 b | 3.6 ± 1.7 a  | *              |
| Sulfur odor         | 7.2 ± 0.8          | 6.9 ± 1.4   | 6.7 ± 1.7    | 6.5 ± 1     | 7 ± 1.3      | ns             |
| Off-odor            | 0.1 ± 0.3          | 0.3 ± 0.9   | 0.1 ± 0.3    | 0.9 ± 1.4   | 0.3 ± 0.5    | ns             |
| Hardness            | 8.3 ± 0.4 a        | 8.3 ± 0.9 a | 7.2 ± 1 ab   | 5 ± 1.2 c   | 6 ± 2.9 bc   | ***            |
| Crunchiness         | 8.7 ± 0.7 a        | 8.7 ± 0.8 a | 7.1 ± 1.1 b  | 5.6 ± 1.4 c | 6 ± 2.5 bc   | ***            |
| Juiciness           | 8.2 ± 0.7 a        | 8.4 ± 0.8 a | 7.3 ± 1 b    | 7 ± 0.8 b   | 7 ± 1 b      | ***            |
| Fresh cabbage taste | 3.9 ± 1.7 a        | 4.4 ± 1.6 a | 4.2 ± 1.7 ab | 3.1 ± 0.8 b | 3.6 ± 1.9 ab | *              |
| Sulphur taste       | 7.5 ± 1.7          | 7.1 ± 1.9   | 7.5 ± 0.6    | 6.8 ± 1     | 6.4 ± 1.2    | ns             |
| Sweetness           | 3.2 ± 1.9          | 3.8 ± 1.9   | 2.8 ± 1.8    | 2.8 ± 1.1   | 2.8 ± 2      | ns             |
| Saltiness           | 7 ± 2 ab           | 6.3 ± 2.3 b | 6.6 ± 1.3 b  | 7.9 ± 0.7 a | 6.2 ± 2.3 b  | *              |
| Sourness            | 7.8 ± 0.8          | 7.3 ± 1.5   | 7.7 ± 1.2    | 8 ± 0.6     | 7.2 ± 0.9    | ns             |
| Bitterness          | 2.2 ± 0.9          | 2.7 ± 1.4   | 3.3 ± 1.1    | 2.8 ± 0.9   | 3.4 ± 2.2    | ns             |
| Astringency         | 2.1 ± 0.8          | 2.6 ± 1.3   | 3.2 ± 1.2    | 2.4 ± 1.1   | 2.7 ± 1.1    | ns             |
| Off-taste           | 0.1 ± 0.3          | 0.1 ± 0.3   | 0.1 ± 0.3    | 0.3 ± 0.7   | 0.1 ± 0.3    | ns             |
| Overall quality     | 8.4 ± 0.6 ab       | 8.5 ± 1.3 a | 7.6 ± 0.8 bc | 5.9 ± 0.8 d | 6.8 ± 0.7 c  | ***            |

The means (± standard deviation) with different letters indicate homogenous groups in Tukey's *post-hoc* test

\* $p \leq 0.05$ , \*\*  $p \leq 0.01$ , \*\*\*  $p \leq 0.001$ , ns: non-significant

Supplementary Table S3. Sensory scores of sauerkraut samples from 'Brgijski', 'Žminjski' and commercial sauerkrauts (CS-1, CS-2, and CS-3) obtained on the Hedonistic scale

| Sensory attributes  | Sauerkraut samples |              |              |              |              | <i>p-value</i> |
|---------------------|--------------------|--------------|--------------|--------------|--------------|----------------|
|                     | 'Brgijski'         | 'Žminjski'   | CS-1         | CS-2         | CS-3         |                |
| Color               | 5.4 ± 0.8          | 5.3 ± 1.1    | 5.9 ± 0.7    | 5.2 ± 0.8    | 5.6 ± 1.1    | ns             |
| Sulfur odor         | 5.7 ± 0.7 a        | 4.9 ± 1.3 ab | 5.6 ± 1 a    | 4.5 ± 0.8 b  | 4.7 ± 1.2 b  | *              |
| Off-odor            | 0 ± 0              | 0.1 ± 0.3    | 0 ± 0        | 0.6 ± 1.1    | 0.3 ± 0.9    | ns             |
| Hardness            | 6.2 ± 0.4 a        | 6.5 ± 0.7 a  | 5.6 ± 0.9 a  | 4.5 ± 1.3 b  | 4.2 ± 1.8 b  | ***            |
| Crunchiness         | 6.5 ± 1 a          | 6.6 ± 0.7 a  | 5.9 ± 0.9 ab | 5.1 ± 1.2 bc | 4.6 ± 1.4 c  | ***            |
| Juiciness           | 6.5 ± 0.6 a        | 6.1 ± 0.9 ab | 5.7 ± 0.8 bc | 5.9 ± 0.3 ab | 5.1 ± 1.2 c  | **             |
| Fresh cabbage taste | 5.3 ± 0.9 a        | 4.9 ± 1 ab   | 4.5 ± 0.8 bc | 3.9 ± 0.7 c  | 4.2 ± 0.8 c  | ***            |
| Sulphur taste       | 5.8 ± 1.2          | 5.3 ± 1.2    | 5.3 ± 0.9    | 5.1 ± 0.7    | 5 ± 0.8      | ns             |
| Sweetness           | 5.4 ± 1.1 a        | 4.9 ± 0.7 ab | 4.5 ± 1.4 bc | 3.8 ± 1.2 d  | 4.1 ± 1 cd   | ***            |
| Saltiness           | 6.1 ± 1.5 a        | 5.7 ± 1.7 ab | 5 ± 1.4 bc   | 4.5 ± 1.4 c  | 5 ± 1.7 bc   | *              |
| Sourness            | 6 ± 1.1            | 5.9 ± 1.2    | 5.8 ± 0.6    | 5.3 ± 1.3    | 5.2 ± 0.9    | ns             |
| Bitterness          | 4.6 ± 1.6          | 4.3 ± 1.4    | 4.4 ± 1.4    | 3.8 ± 0.8    | 4.6 ± 0.8    | ns             |
| Astringency         | 4.9 ± 1.1          | 4.6 ± 1      | 4.9 ± 1.2    | 4.3 ± 1.1    | 4.3 ± 1.1    | ns             |
| Off-taste           | 0 ± 0              | 0 ± 0        | 0 ± 0        | 0.2 ± 0.6    | 0 ± 0        | ns             |
| Overall quality     | 6.2 ± 0.6 a        | 6.3 ± 1.3 a  | 5.4 ± 0.7 b  | 4.7 ± 0.6 c  | 5.3 ± 0.4 bc | ***            |

The means (± standard deviation) with different letters indicate homogenous groups in Tukey's *post-hoc* test

\* $p \leq 0.05$ , \*\*  $p \leq 0.01$ , \*\*\*  $p \leq 0.001$ , ns: non-significant

Supplementary Table S4. ANOVA of phytochemical and physicochemical parameters with PLS-DA VIP scores equal or higher than one. The means ( $\pm$  standard

| Parameter (VIP)                                                     | Cultivar        |                  | <i>p</i> -value | Storage conditions |                  | <i>p</i> -value | Cultivar*Storage conditions |                  |                   |                   |                 |
|---------------------------------------------------------------------|-----------------|------------------|-----------------|--------------------|------------------|-----------------|-----------------------------|------------------|-------------------|-------------------|-----------------|
|                                                                     | 'Žminjski'      | 'Brgujski'       |                 | Ambient storage    | Cold storage     |                 | 'Žminjski'                  |                  | 'Brgujski'        |                   | <i>p</i> -value |
|                                                                     |                 |                  |                 |                    |                  |                 | Ambient storage             | Cold storage     | Ambient storage   | Cold storage      |                 |
| FRAP (1)<br>(nmol TE/100g FW)                                       | 129 ± 15        | 136 ± 21         | ns              | 118 ± 10           | 147 ± 10         | **              | 116 ± 1                     | 143 ± 5          | 121 ± 15          | 152 ± 13          | ns              |
| 1-Decanol (2)<br>(normalised peak area)                             | 24886 ± 12141   | 27675 ± 9949     | ns              | 35072 ± 7366       | 17489 ± 3361     | **              | 34115 ± 10326               | 15656 ± 2510     | 36029 ± 5125      | 19322 ± 3443      | ns              |
| ethyl octanoate (3)<br>(normalised peak area)                       | 52664 ± 20429   | 32154 ± 9690     | **              | 54695 ± 18751      | 30123 ± 7057     | ***             | 69871 ± 12449               | 35458 ± 395      | 39518 ± 5747      | 24789 ± 6243      | ns              |
| DPPH (4)                                                            | 116 ± 8         | 113 ± 8          | ns              | 108 ± 4            | 120 ± 5          | **              | 109 ± 4                     | 122 ± 3          | 107 ± 5           | 118 ± 6           | ns              |
| 2-isothiocyanatobutane<br>(5)<br>(normalised peak area)             | 37845 ± 29302   | 16293 ± 4030     | ***             | 41630 ± 25258      | 12508 ± 2587     | ***             | 64514 ± 3528 a              | 11175 ± 527 c    | 18745 ± 3379 b    | 13840 ± 3336 bc   | ***             |
| ( <i>L</i> ) (6)                                                    | 57.4 ± 1.4      | 53.5 ± 3.4       | **              | 57.2 ± 1.6         | 53.8 ± 3.7       | **              | 57.9 ± 2.1 a                | 57 ± 0.3 a       | 56.5 ± 0.7 a      | 50.6 ± 1.7 b      | *               |
| 2-undecenal (7)<br>(normalised peak area)                           | 235775 ± 218475 | 32798 ± 9408     | ***             | 233586 ± 220813    | 34987 ± 10784    | ***             | 434118 ± 34235 a            | 37433 ± 11719 b  | 33055 ± 9254 b    | 32541 ± 11638 b   | ***             |
| (a) (8)                                                             | 10.3 ± 0.7      | 20.7 ± 3.2       | ***             | 14.3 ± 3.8         | 16.7 ± 7.7       | ***             | 10.9 ± 0.3 c                | 9.7 ± 0.4 d      | 17.8 ± 0.2 b      | 23.7 ± 0.5 a      | ***             |
| ethyl hexadecanoate (9)<br>(normalised peak area)                   | 457689 ± 108710 | 1920046 ± 261200 | ***             | 1110794 ± 640133   | 1266941 ± 968884 | **              | 531119 ± 114670 c           | 384260 ± 14824 c | 1690469 ± 56617 b | 2149623 ± 96135 a | ***             |
| ( <i>Z</i> )-3-Octen-1-ol acetate<br>(10)<br>(normalised peak area) | 285473 ± 208690 | 138138 ± 56751   | ***             | 101834 ± 37920     | 321777 ± 171272  | ***             | 100072 ± 20434 b            | 470875 ± 73075 a | 103597 ± 56285 b  | 172678 ± 36116 b  | ***             |
| EC (11)<br>(μS/cm)                                                  | 119 ± 27        | 107 ± 4          | **              | 99 ± 7             | 127 ± 18         | ***             | 94 ± 4 c                    | 143 ± 4 a        | 105 ± 4 b         | 110 ± 3 b         | ***             |

deviation) with different letters indicate homogenous groups in Tukey's *post-hoc* test. \* $p \leq 0.05$ , \*\*  $p \leq 0.01$ , \*\*\*  $p \leq 0.001$ , ns: non-significant
